# Supplementary material for: PET clinical study of novel antipsychotic LB-102 demonstrates unexpectedly prolonged dopamine receptor target engagement
Source: PubMed Central journal article supplement (PMC11632090; doi:10.1038/s41386-024-01951-x), 2024-10-16
Supplement: 41386_2024_1951_MOESM1_ESM.pdf [file 41386_2024_1951_MOESM1_ESM.pdf]

**PET clinical study of novel antipsychotic LB-102 demonstrates unexpectedly prolonged dopamine receptor engagement**

**Supplementary Information**

## Table of Contents

|                                                                                                 |    |
|-------------------------------------------------------------------------------------------------|----|
| TABLE S1: CONSORT FLOW DIAGRAM                                                                  | 3  |
| TABLE S2: LB-102-002 INCLUSION AND EXCLUSION CRITERIA                                           | 4  |
| FIGURE S1: SCHEMATIC OF STUDY DESIGN                                                            | 7  |
| TABLE S3: SCHEDULE OF STUDY ASSESSMENTS                                                         | 8  |
| TABLE S4: STRM DOPAMINE %RO AT EACH TIME POINT FOR EACH SUBJECT IN EACH REGION                  | 9  |
| TABLE S5: SPECIFIC ACTIVITIES AND WEIGHT <sup>11</sup> C RACLOPRIDE INJECTED, COHORT AVERAGES   | 10 |
| TABLE S6: SPECIFIC ACTIVITIES AND WEIGHT <sup>11</sup> C RACLOPRIDE INJECTED, INDIVIDUAL VALUES | 10 |

Table S1: Consort Flow Diagram

### CONSORT 2010 Flow Diagram

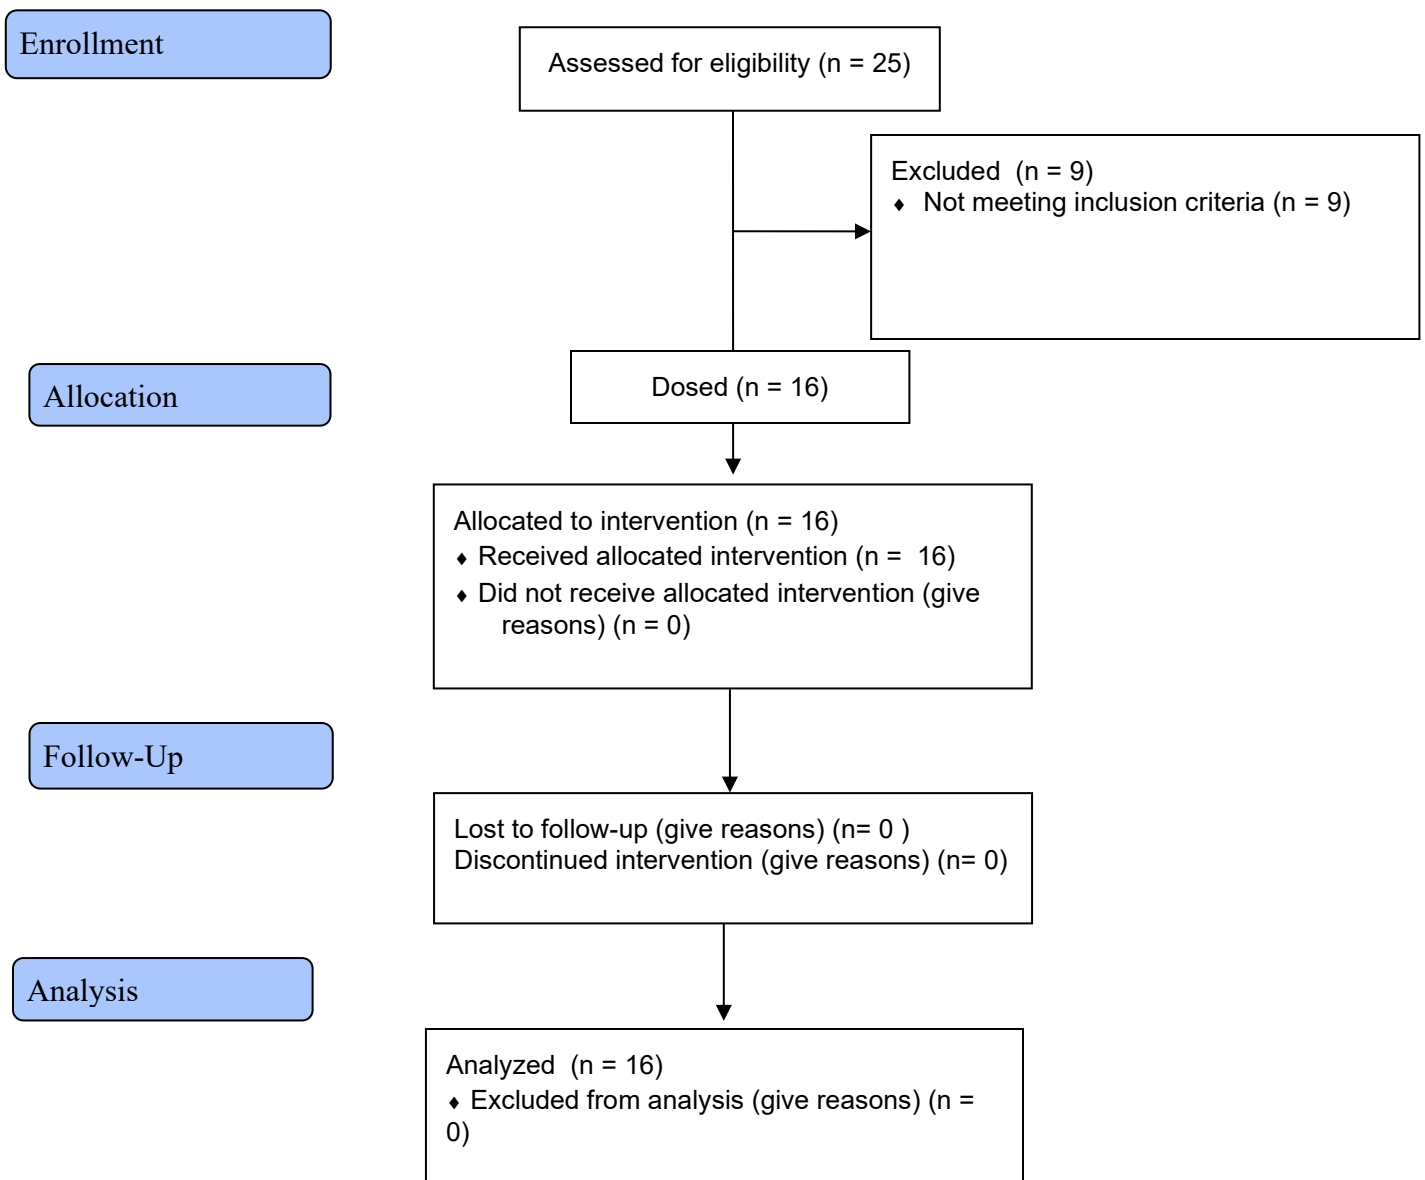

Table S2: LB-102-002 inclusion and exclusion criteria

**Main Criteria for Eligibility:**

***Inclusion Criteria:***

A subject will be eligible for inclusion in the study if he or she meets the following criteria:

1. Competent to provide informed consent.
2. Voluntarily provide informed consent and Health Insurance Portability and Accounting Act (HIPAA) Authorization in accordance with local regulations and governing Institutional Review Board (IRB) requirements prior to any procedures or evaluations performed specifically for the sole purpose of the study.
3. Healthy adult female and male subjects between 18 to 55 years of age inclusive at the screening visit.
4. Body Mass Index (BMI)  $\geq 18$  and  $\leq 30$  kg/m<sup>2</sup> at screening visit.
5. Subjects must be in good general health as determined by medical history and physical examination with no clinically significant medical findings and no history of significant medical disease (e.g., cardiovascular, pulmonary, renal, etc.) or acute condition with the past 30 days, as determined by the study investigators.
6. Have normal clinical laboratory test results and ECG, which are not considered to be clinically significant by the Investigator.
7. Females participating in the study:
  - a. Either must be of non-childbearing potential [surgically sterilized: hysterectomy, bilateral tubal ligation, salpingectomy, and/or bilateral oophorectomy at least 26 weeks before the Screening Visit] or postmenopausal. Menopause is defined as being amenorrhoeic for at least 2 years with plasma follicle-stimulating hormone (FSH) levels in the postmenopausal range at screening, based on the central laboratory's ranges;  
**OR**
  - b. **Females of child-bearing potential must** have a negative pregnancy test and be not breastfeeding at Screening and use either abstinence or an accepted contraception method during the treatment period and for an additional period of 30 days after the end of investigational treatment. For this study, accepted contraception methods include:
    - i. condom plus spermicide
    - ii. condom plus diaphragm
    - iii. condom plus cervical cap or female condom

- iv. hormonal contraceptives
  - v. intrauterine device
  - vi. partner vasectomy and a use of barrier contraception methods
8. If male, subject must be surgically sterile or practicing at least 1 of the following methods of contraception, from initial study drug administration through 90 days after administration of the last dose of study drug:
- a. Have had a vasectomy (at least 6 months earlier);
  - b. Use of a double-barrier contraception method, defined as male use of a condom and female use of a barrier method (e.g., contraceptive sponge, spermicidal jelly or cream with or without a diaphragm);
  - c. Partner use of hormonal contraceptives (oral, parenteral, vaginal, or transdermal) for at least 3 months prior to study drug administration;
  - d. Partner use of an intrauterine device;
  - e. Complete abstinence from sexual intercourse;
  - f. Male subjects not practicing complete abstinence must use a condom as a required form of birth control (in addition to at least 1 of the other methods listed above, if desired) in order to protect partners of male participants from exposure to study drug.
9. If male, subject must agree to abstain from sperm donation through 90 days after administration of the last dose of investigational drug.

**Exclusion Criteria:**

A subject will be excluded from the study if he or she meets the following criteria:

1. Are pregnant or lactating.
2. Have a history or presence of significant cardiovascular, respiratory, hepatic, renal, gastrointestinal, endocrine, neurological or psychological/psychiatric disorders which, in the opinion of the Investigator, increases the risk of the study drug or may confound the interpretation of study measures.
3. Clinically significant abnormal findings on physical examination or vital signs as determined by PI.
4. Individuals with pacemakers, aneurysm clips, shrapnel, or other restricted implanted metallic devices will be excluded from study. All subjects complete the standard MRI screening questionnaire prior to MRI.
5. History or presence of psychiatric or neurological disease or condition as determined by the PI.
6. History of seizures.
7. Subject with any history or current evidence of suicidal behavior.

8. Unwilling to complete any planned study assessments.
9. Have a history of blood donation in excess of 500 mL of blood within 30 days prior to Screening.
10. Have received treatment with an investigational drug or device within 30 days prior to Screening.
11. Have a positive test for Human Immunodeficiency Virus (HIV) antibodies 1 and 2, Hepatitis B Surface Antigen (HBsAg) or Hepatitis C Virus (HCV) antibody.
12. Any subject who is known to be allergic to the study drug or any components of the study drug.
13. The subject has a fasting blood glucose  $\geq$  126 mg/dL or hemoglobin A1c (HbA1c)  $\geq$  6.5% at Screening.
14. The subject has a history of QT prolongation or dysrhythmia or a family history of prolonged QT interval or sudden death.
15. Clinically significant abnormal finding on ECG and/or evidence of any of the following cardiac conduction abnormalities at Screening:
  - a. Heart rate  $<$  40 bpm and  $>$  100 bpm (based on the ECG reading)
  - b. QTcF interval  $>$  450 msec for males and females
  - c. PR interval  $\geq$  200 msec
  - d. Intraventricular conduction delay with QRS duration  $>$  120 msec
  - e. Evidence of second- or third-degree atrioventricular block (AVB)
  - f. Electrocardiographic evidence of complete left bundle branch block (LBBB), complete right bundle branch block (RBBB), or incomplete LBBB
16. Any subject who has a positive Urine Drug Screen test on the Day 0 or Day 1 Visit, unless in the Investigator's (Principal Investigator or Sub-Investigator) documented opinion, the positive test does not signal a clinical condition that would impact the safety of the subject or interpretation of the trial results. The Investigator (Principal Investigator or Sub-Investigator) must provide their documented opinion to the Sponsor's Medical Monitor, and then the Sponsor (CMO) within 24 hours of their decision.
17. Any subject who has an Alcohol Breathalyzer test result deemed positive by the Investigator (Principal Investigator or Sub-Investigator) on the Day 0 or Day 1 Visit, unless in the Investigator's (Principal Investigator or Sub-Investigator) documented opinion, the positive test does not signal a clinical condition that would impact the safety of the subject or interpretation of the trial results. The Investigator (Principal Investigator or Sub-Investigator) must provide their documented opinion to the Sponsor's Medical Monitor, and then the Sponsor (CMO) within 24 hours of their decision.

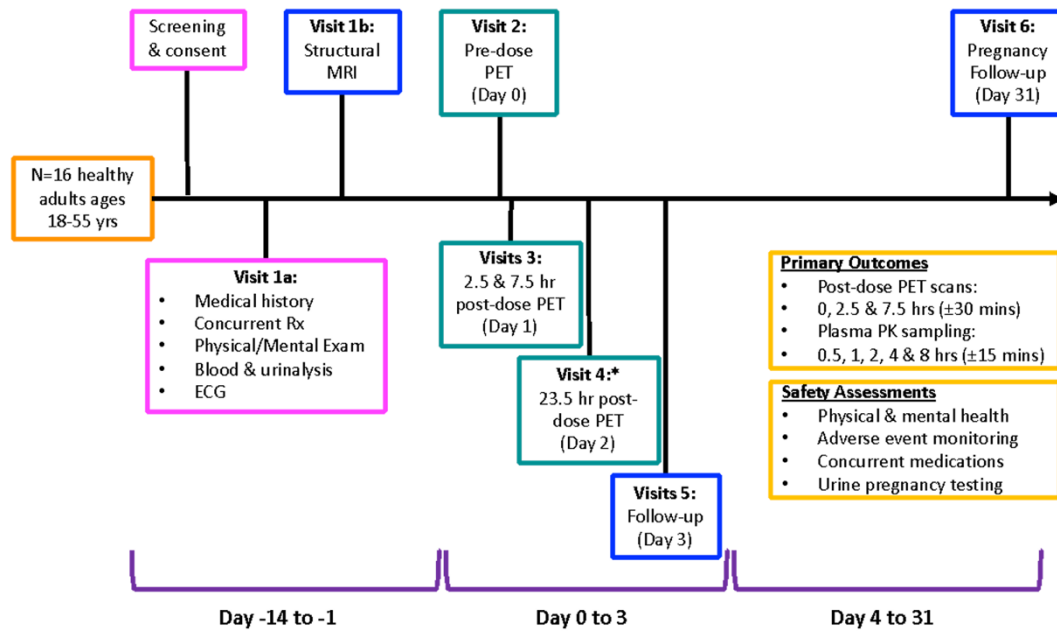

*\*Medically stable participants will be discharged from the research unit after completing the 23.5 hr post-dose PET scan and 24 hr post-dose PK sampling is completed. A research team member will contact the participant by phone to ensure they returned home safely and will conduct safety assessments via phone during the Day 2 check-in and again by phone on Day 3. The telephone follow-up check in on Day 31 is to assess for pregnancy since the last study contact.*

Figure S1: Schematic of study design

Table S3: Schedule of Study Assessments

| Study Visit                                           | 1              | 2              | 3              | 4              | 5  | 6  |
|-------------------------------------------------------|----------------|----------------|----------------|----------------|----|----|
| Study Day(s)                                          | -14 to -1      | 0              | 1              | 2              | 3  | 31 |
| Location                                              | OP             | OP             | IP             | IP/OP          | OP | OP |
| Informed Consent                                      | X              |                |                |                |    |    |
| Medical History                                       | X              | X              |                |                |    |    |
| Demographics                                          | X              |                |                |                |    |    |
| Height, Weight, BMI                                   | X              |                |                |                |    |    |
| Physical Exam <sup>1</sup> & Vital Signs <sup>2</sup> | X <sup>1</sup> | X <sup>1</sup> | X <sup>2</sup> | X <sup>2</sup> |    |    |
| Structural MRI <sup>3</sup>                           | X              |                |                |                |    |    |
| Screening labs*                                       | X              | X              |                | X*             |    |    |
| Urine Drug Screen <sup>@</sup>                        | X              | X              | X              |                |    |    |
| Alcohol Breathalyzer                                  |                | X              | X              |                |    |    |
| Serum HbA1c                                           | X              |                |                |                |    |    |
| Serum Prolactin                                       | X              |                |                | X              |    |    |
| HIV, HBsAg, and HCV                                   | X              |                |                |                |    |    |
| C-SSRS                                                | X              |                |                | X              |    |    |
| 12-Lead ECG <sup>4</sup>                              | X              | X              |                | X              |    |    |
| Pregnancy Test <sup>5</sup>                           | X              | X              | X              | X              |    |    |
| Plasma PK sampling <sup>6</sup>                       |                |                | X              | X              |    |    |
| Dose LB-102 <sup>7</sup>                              |                |                | X              |                |    |    |
| Concurrent Meds <sup>8</sup>                          | X              | X              | X              | X              | X  |    |
| Adverse Events <sup>8</sup>                           |                | X              | X              | X              | X  |    |
| PET Scan <sup>9</sup>                                 |                | X              | X              | X              |    |    |
| Phone check-in <sup>10</sup>                          |                |                |                | X              | X  | X  |

BMI=Body Mass Index; CSSRS=Columbia Suicide Severity Rating Scale; ECG=Electrocardiogram; FSH=Follicle-Stimulating

<sup>1</sup> Physical examination can be performed at screening or on Day 0.

<sup>2</sup> Vital Signs are measured at Screening, Day 0 (at time of PET scan, ±30 min), Day 1 (pre-dose), and at the time of each PET scan (±30 min, Visits 3 and 4).

<sup>3</sup> Screening MRI can be done any time before Day 0. An MRI obtained in the prior 6 months for research purposes can substitute for this screening scan.

<sup>4</sup> ECG is done at Screening, Day 0 (prior to PET scan, ±30 min), and Day 2 (24 h post-dose, ±30 min).

<sup>5</sup> Serum pregnancy test at Screening and Urine pregnancy test on Days 0-2 for all females of childbearing potential.

<sup>6</sup> Plasma PK samples are collected on Day 1 (pre-dose), and at the following times post dose (±15 min): 0.5, 1, 2, 4, 8, and 24 h (Day 2).

<sup>7</sup> Participants are required to fast for approximately 12 hours prior to Day 1 dosing.

<sup>8</sup> Concomitant Medication and Adverse Event Assessment will be recorded once per day on the days indicated.

<sup>9</sup> For Cohorts 1-2, PET scans are completed at 2.5, 7.5, and 23.5 (±30 min) hours post oral dose of LB-102.

<sup>10</sup> Day 2 follow-up call is done in the evening when the subject returns home. Day 3 follow-up call is done in the morning.

\* On Day 2, blood is collected for laboratory tests (hematology, clinical chemistry, urinalysis).

@ Urine Drug Screens will occur at Screening and Days 0-1.

+ Or Serum FSH for post-menopausal females.



Table S4: STRM dopamine %RO at each time point for each subject in each region

|           |               | 3 h |    |    |    | 8 h |    |    |    | 24 h |    |    |    | 48 h |    |    |    |  |
|-----------|---------------|-----|----|----|----|-----|----|----|----|------|----|----|----|------|----|----|----|--|
|           |               | S1  | S2 | S3 | S4 | S1  | S2 | S3 | S4 | S1   | S2 | S3 | S4 | S1   | S2 | S3 | S4 |  |
| 50 mg     | Caudate       | 26  | 28 |    | 23 | 52  | 42 | 36 | 43 | 58   | 45 | 53 | 45 |      |    |    |    |  |
|           | Putamen       | 23  | 25 |    | 19 | 47  | 37 | 25 | 34 | 48   | 36 | 37 | 34 |      |    |    |    |  |
|           | Thalamus      | 40  | 42 |    | 35 | 48  | 31 | 42 | 39 | 39   | 23 | 45 | 28 |      |    |    |    |  |
|           | Temporal lobe | 20  | 16 |    | 26 | 32  | 14 | 20 | 28 | 30   | 11 | 19 | 18 |      |    |    |    |  |
|           |               | S1  | S2 | S3 | S4 | S1  | S2 | S3 | S4 | S1   | S2 | S3 | S4 | S1   | S2 | S3 | S4 |  |
| 100 mg    | Caudate       | 39  | 56 | 50 | 26 | 75  | 78 | 84 | 55 | 76   | 72 | 76 | 68 |      |    |    |    |  |
|           | Putamen       | 32  | 52 | 46 | 25 | 67  | 75 | 77 | 49 | 68   | 66 | 67 | 56 |      |    |    |    |  |
|           | Thalamus      | 28  | 42 | 34 | 31 | 40  | 49 | 46 | 49 | 26   | 43 | 39 | 39 |      |    |    |    |  |
|           | Temporal lobe | 18  | 17 | 20 | 10 | 24  | 17 | 20 | 15 | 13   | 23 | 22 | 15 |      |    |    |    |  |
|           |               | S1  | S2 | S3 | S4 | S1  | S2 | S3 | S4 | S1   | S2 | S3 | S4 | S1   | S2 | S3 | S4 |  |
| 75 mg     | Caudate       | 27  | 53 | 57 | 5  |     |    |    |    | 70   | 56 | 69 | 48 | 53   | 45 | 52 | 13 |  |
|           | Putamen       | 20  | 48 | 50 | 2  |     |    |    |    | 52   | 53 | 53 | 37 | 38   | 39 | 38 | 12 |  |
|           | Thalamus      | 31  | 44 | 37 | 5  |     |    |    |    | 64   | 37 | 36 | 21 | 16   | 25 | 20 | 0  |  |
|           | Temporal lobe | 13  | 21 | 28 | 0  |     |    |    |    | 45   | 17 | 20 | 27 | 4    | 16 | 16 | 0  |  |
|           |               | S1  | S2 | S3 | S4 | S1  | S2 | S3 | S4 | S1   | S2 | S3 | S4 | S1   | S2 | S3 | S4 |  |
| 100 mg SS | Caudate       | 84  | 88 |    |    | 86  | 89 |    |    | 80   | 83 |    |    |      |    |    |    |  |
|           | Putamen       | 80  | 79 |    |    | 83  | 80 |    |    | 73   | 72 |    |    |      |    |    |    |  |
|           | Thalamus      | 50  | 78 |    |    | 51  | 80 |    |    | 48   | 69 |    |    |      |    |    |    |  |
|           | Temporal lobe | 19  | 32 |    |    | 18  | 25 |    |    | 22   | 31 |    |    |      |    |    |    |  |
|           |               | S1  | S2 | S3 | S4 | S1  | S2 | S3 | S4 | S1   | S2 | S3 | S4 | S1   | S2 | S3 | S4 |  |
| 50 mg SS  | Caudate       | 75  | 74 |    |    | 78  | 76 |    |    | 75   | 73 |    |    |      |    |    |    |  |
|           | Putamen       | 67  | 66 |    |    | 69  | 70 |    |    | 66   | 63 |    |    |      |    |    |    |  |
|           | Thalamus      | 44  | 37 |    |    | 40  | 43 |    |    | 38   | 56 |    |    |      |    |    |    |  |
|           | Temporal lobe | 18  | 26 |    |    | 17  | 25 |    |    | 35   | 34 |    |    |      |    |    |    |  |
|           |               | S1  | S2 | S3 | S4 | S1  | S2 | S3 | S4 | S1   | S2 | S3 | S4 | S1   | S2 | S3 | S4 |  |

Table S5: Specific activities and weight <sup>11</sup>C raclopride injected, cohort averages

| Cohort Average |                             |       |                    |      |
|----------------|-----------------------------|-------|--------------------|------|
| Cohort         | Specific Activity (Ci/mmol) | SEM   | Injected Mass (ug) | SEM  |
| 1              | 927.52                      | 62.83 | 5.15               | 0.39 |
| 2              | 934.11                      | 96.82 | 5.50               | 0.31 |
| 3              | 879.36                      | 59.29 | 5.78               | 0.17 |
| 4              | 1019.85                     | 58.07 | 5.23               | 0.25 |

Table S6: Specific activities and weight <sup>11</sup>C raclopride injected, individual values

| Subject Average |                             |        |                    |      |
|-----------------|-----------------------------|--------|--------------------|------|
| Participant     | Specific Activity (Ci/mmol) | SEM    | Injected Mass (ug) | SEM  |
| 01S0001         | 811.86                      | 147.83 | 6.03               | 1.19 |
| 01S0002         | 864.71                      | 147.50 | 5.41               | 0.26 |
| 01S0003         | 988.54                      | 131.09 | 3.86               | 0.81 |
| 01S0005         | 1060.21                     | 65.64  | 4.99               | 0.37 |
| 01S0006         | 970.26                      | 97.07  | 5.91               | 0.83 |
| 01S0009         | 944.11                      | 169.06 | 5.28               | 0.54 |
| 01S0011         | 789.12                      | 143.60 | 5.66               | 0.27 |
| 01S0012         | 1032.93                     | 343.70 | 5.13               | 0.84 |
| 01S0013         | 974.23                      | 213.07 | 5.25               | 0.36 |
| 01S0014         | 977.91                      | 23.62  | 5.68               | 0.16 |
| 01S0016         | 788.00                      | 51.71  | 6.04               | 0.07 |
| 01S0017         | 777.32                      | 95.89  | 6.15               | 0.52 |
| 01S0018         | 1001.77                     | 78.86  | 5.69               | 0.30 |
| 01S0020         | 970.12                      | 86.27  | 5.21               | 0.33 |
| 01S0021         | 949.55                      | 119.79 | 5.37               | 0.50 |
| 01S0024         | 1157.96                     | 174.61 | 4.67               | 0.75 |
